# Supplementary material
Source: PubMed Central journal article supplement (PMC2701870)
Supplement: JCI38003sd.pdf [file JCI38003sd.pdf]

**Supplemental Table 1: GFAP levels in the CSF of individuals with neurological conditions reflecting a wide range of etiologies are elevated**

| CONDITION                                   | CONTROLS |                                                                                |             | PATIENTS       |                                                                                                     |                              | S  | REF  |
|---------------------------------------------|----------|--------------------------------------------------------------------------------|-------------|----------------|-----------------------------------------------------------------------------------------------------|------------------------------|----|------|
|                                             | n        | mean ± SD ng/L                                                                 | range       | n              | mean ± SD ng/L                                                                                      | range                        |    |      |
| <i>Vascular</i>                             |          |                                                                                |             |                |                                                                                                     |                              |    |      |
| vasculitis                                  | nr       | [<750 younger] <sup>a</sup><br>[<1250 older] <sup>a</sup>                      | nr          | 32             | 10,791 ± 7646 (SEM)                                                                                 | nr                           | L  | (1)  |
| ischemic infarcts                           | 18       | 7404 ± 2099 (SEM)                                                              | 4138–11,518 | 25             | 16,005 ± 17,302 (SEM)                                                                               | nr                           | L  | (2)  |
| infarcts                                    | 25       | [~100–1300] <sup>a</sup>                                                       | nr          | 9              | nr                                                                                                  | ~1000–100,000 <sub>b</sub>   | L  | (3)  |
| ischemic infarcts - spinal cord             | 5        | 600 ± 300                                                                      | 300–1000    | 3              | 354,700 ± 459,000                                                                                   | 2000–10 <sup>6</sup>         | nr | (4)  |
| ischemia – aortic aneurysm repair           | nr       | [375 ± 159 younger<br>95% < 700<br>671 ± 263 older<br>95% < 1200] <sup>a</sup> | nr          | 2              | nr                                                                                                  | 190,000–330,000 <sup>b</sup> | L  | (5)  |
| subarachnoid hemorrhage                     | nr       | 95% < 9 (lumbar)                                                               | nr          | 5              | 18,950 ± 16,078                                                                                     | 1550–40,630                  | V  | (6)  |
| <i>Trauma</i>                               |          |                                                                                |             |                |                                                                                                     |                              |    |      |
| traumatic brain injury                      | nr       | 95% < 9 (lumbar)                                                               | nr          | 11             | 16678 ± 15022                                                                                       | 515–43,730                   | V  | (6)  |
| <i>Developmental</i>                        |          |                                                                                |             |                |                                                                                                     |                              |    |      |
| autism                                      | 10       | 67 ± 17 (SEM)                                                                  | 16–163      | 47             | 185 ± 20 (SEM)                                                                                      | ~16–600                      | L  | (7)  |
| basal ganglia                               | 10       | [61 ± 17 (SEM)] <sup>a</sup>                                                   | nr          | 3              | 227 ± 34 (SEM)                                                                                      | nr                           | L  | (8)  |
| hydrocephalus                               | nr       | 700 ± 900 (lumbar)                                                             | nr          | 41<br>27<br>12 | Gr 1: 19,000 ± 26,000<br>Gr 2: 20,000 ± 21,000<br>Gr 3: 2.2 x 10 <sup>6</sup> ± 3 x 10 <sup>6</sup> | nr                           | V  | (9)  |
| encephalopathies and white matter disorders | 10       | [67 ± 54] <sup>a</sup>                                                         | nr          | nr             | progr 223 ± 186<br>non-progr 128 ± 86                                                               | 15–869<br>15–264             | nr | (10) |
| metabolic - unspecified                     | nr       | [< 10,000] <sup>a</sup>                                                        | nr          | 16             | metabolic/storage                                                                                   | 0–94,000                     | L  | (11) |
| cerebral white matter                       | nr       | [67 ± 17 (SEM)] <sup>a</sup>                                                   | nr          | 26             | 1188 ± 2508 (SEM)                                                                                   | nr                           | nr | (12) |
| neonatal asphyxia                           | 8        | 538 median                                                                     | 458–1051    | 22             | 1428 median                                                                                         | 427–49,706                   | L  | (13) |

|                                    |    |                                  |           |                     |                                                                                                    |                                                                                              |    |      |
|------------------------------------|----|----------------------------------|-----------|---------------------|----------------------------------------------------------------------------------------------------|----------------------------------------------------------------------------------------------|----|------|
| premature birth                    | 10 | 222 median                       | 87–554    | 17<br>10            | normal pre-term<br>106 (ns)<br>abnormal pre-term<br>576                                            | 15–362<br>265–16,000                                                                         | L  | (14) |
| <b>Genetic</b>                     |    |                                  |           |                     |                                                                                                    |                                                                                              |    |      |
| Alexander disease                  | nr | [<175] <sup>a</sup>              | nr        | 3                   | na                                                                                                 | 4760–30,000                                                                                  | nr | (15) |
| <b>Infectious and Inflammatory</b> |    |                                  |           |                     |                                                                                                    |                                                                                              |    |      |
| multiple sclerosis                 | 5  | 142 ± 26                         | nr        | 13                  | RR 386 ± 169                                                                                       | nr                                                                                           | L  | (16) |
| multiple sclerosis                 | 25 | 250 ± 34                         | 125–450   | 58<br>5<br>21<br>15 | RR 300 (ns) <sup>b</sup><br>PR 300 (ns) <sup>b</sup><br>SP 375 <sup>b</sup><br>PP 400 <sup>b</sup> | 125–600 <sup>b</sup><br>125–700 <sup>b</sup><br>130–625 <sup>b</sup><br>130–900 <sup>b</sup> |    | (17) |
| meningitis/<br>encephalitis        | 25 | nr                               | ~100–1300 | 13                  | nr                                                                                                 | ~1000–30,000 <sup>b</sup>                                                                    | L  | (3)  |
| Lyme neuroborreliosis              | 9  | 208 median                       | 32–776    | 23                  | 510 median <sup>b</sup>                                                                            | nr                                                                                           | nr | (18) |
| systemic lupus erythematosus       | 99 | _ 436 ± 152 (SEM)<br>_ 387 ± 194 | nr        | 31<br>54            | NPSLE 1904 ± 975 (SEM)<br>w/o CNS 534 ± 234                                                        | nr                                                                                           | L  | (19) |
| neuromyelitis optica               | 5  | 600 ± 300                        | 300–1000  | 10<br>3             | 7666 ± 15267 <sup>c</sup><br><br>before Rx<br>17,827±26142<br>after Rx 1.8 ± 1.5                   | 8000–80,000,000 <sup>b</sup>                                                                 | nr | (4)  |
| Guillain-Barrè                     | 30 | 330 median                       | nr        | 12<br>9             | AIDP 350 median (ns)<br>axonal 550 median                                                          | nr                                                                                           | nr | (20) |

|                               |              |                                                                 |             |                     |                                                                                                           |                                                   |    |      |
|-------------------------------|--------------|-----------------------------------------------------------------|-------------|---------------------|-----------------------------------------------------------------------------------------------------------|---------------------------------------------------|----|------|
| <b>Degenerative</b>           |              |                                                                 |             |                     |                                                                                                           |                                                   |    |      |
| dementia                      | nr           | [<10,000] <sup>a</sup>                                          | nr          | 64<br>24<br>7<br>26 | AD 10,800<br>multi-infarct 39,500<br>CJD 65,000<br>undefined 14,700                                       | 0–56,000<br>0–564,000<br>9000–175,000<br>0–53,000 | L  | (11) |
| dementia                      | 25           | nr                                                              | ~100–1300   | 7/9                 | AD / vascular                                                                                             | ~400–2000 <sup>b</sup>                            | L  | (3)  |
| dementia                      | 39           | 569 ± 265                                                       | nr          | 8<br>5<br>29<br>20  | pure AD 936 ± 431<br>(ns)<br>frontal lobe 721 ± 208<br>(ns)<br>AD-type 1081 ± 561<br>vascular 1270 ± 1142 | nr                                                | L  | (21) |
| dementia                      | 13<br>9<br>8 | 2960 ± 1040 young<br>2800 ± 1460 adult<br>3990 ± 1590 senescent | nr          | 27                  | AD 8960 ± 7800                                                                                            | nr                                                | nr | (22) |
| dementia                      | nr           | 95% < 9                                                         | nr          | 68                  | 1374 ± 11098                                                                                              | <5–91,540 <sup>d</sup>                            | L  | (6)  |
| <b>Miscellaneous</b>          |              |                                                                 |             |                     |                                                                                                           |                                                   |    |      |
| normal pressure hydrocephalus | 18           | 4300 ± 700 (SEM)                                                | 2000–14,000 | 12                  | 96,000 ± 23,000 <sup>e</sup> (SEM)                                                                        | ~5000–258,000                                     | L  | (23) |
| normal pressure hydrocephalus | 40           | 637 ± 295                                                       | nr          | 65                  | 1116 ± 1085                                                                                               | nr                                                | L  | (24) |
| normal pressure hydrocephalus | nr           | 95% < 9 (lumbar)                                                | nr          | 12                  | 1197 ± 1226                                                                                               | <5–2970                                           | V  | (6)  |
| seizures                      | 33           | 93 ± 88                                                         | <50–440     | 52                  | 232 ± 440                                                                                                 | <50–3100                                          | nr | (25) |
| schizophrenia                 | 17           | 1190 ± 920                                                      | nr          | 12                  | 1210 ± 810 (ns)                                                                                           | nr                                                | L  | (26) |

All values have been converted to ng/L to facilitate comparison. Unless otherwise noted, values are given as mean ± standard deviation (SD). Additional abbreviations used are “n” number of patients or controls, “SEM” standard error of the mean, “ns” not significant, “AD” Alzheimer’s disease, “CJD” Creutzfeldt-Jakob disease, “ADIP” acute demyelinating inflammatory neuropathy, “GBM” glioblastoma multiforme, “NPSLE” neuropsychiatric systemic lupus erythematosus, “RR” relapsing remitting, “PR” progressive remitting, “SP” secondary progressive, and “PP” primary progressive, “na” not applicable, “nr” not reported. “S” refers to lumbar (L) or ventricular (V) points of collection of CSF if specified by the authors – others are most likely lumbar.

<sup>a</sup> Values for controls surrounded brackets were derived from a prior study, literature, or manufacturer using the particular assay.

<sup>b</sup> Data was presented in graphical form, from which these are estimated values.

<sup>c</sup> Whether standard deviation or standard error of the mean was not specified.

<sup>d</sup> The outlier value at the high end was from a patient who had autopsy-proven CJD.

<sup>e</sup> Eight patients had ventricular samples collected as well, in each case giving values that were higher than those found in lumbar samples.

## Reference List

1. Nylén, K., et al. 2002. Cerebrospinal fluid neurofilament and glial fibrillary acidic protein in patients with cerebral vasculitis. *J. Neurosci. Res.* **67**:844–851.
2. Aurell, A., et al. 1991. Determination of S-100 and glial fibrillary acidic protein concentrations in cerebrospinal fluid after brain infarction. *Stroke* **22**:1254–1258.
3. Rosengren, L.E., Wikkelsø, C., and Hagberg, L. 1994. A sensitive ELISA for glial fibrillary acidic protein: Application in CSF of adults. *J. Neurosci. Methods* **51**:197–204.
4. Misu, T., et al. 2008. Marked increase of CSF GFAP in neuromyelitis optica - an astrocyte damage marker. *J. Neurol. Neurosurg. Psychiatry* In press.
5. Anderson, R.E., et al. 2003. Biochemical markers of cerebrospinal ischemia after repair of aneurysms of the descending and thoracoabdominal aorta. *J. Cardiothorac. Vasc. Anesth.* **17**:598–603.
6. Petzold, A., Keir, G., Green, A.J.E., Giovannoni, G., and Thompson, E.J. 2004. An ELISA for glial fibrillary acidic protein. *J. Immunol. Meth.* **287**:169–177.
7. Rosengren, L.E., et al. 1992. A sensitive ELISA for glial fibrillary acidic protein: Application in CSF of children. *J. Neurosci. Methods* **44**:113–119.
8. Ahlsén, G., et al. 1993. Glial fibrillary acidic protein in the cerebrospinal fluid of children with autism and other neuropsychiatric disorders. *Biol. Psychiatry* **33**:734–743.
9. Beems, T., et al. 2003. Serum- and CSF-concentrations of brain specific proteins in hydrocephalus. *Acta Neurochirurgica* **145**:37–43.
10. Ehlers, S., Kyllerman, M., and Rosengren, L. 1994. Analysis of glial fibrillary acidic protein in the cerebrospinal fluid of children investigated for encephalopathy. *Neuropediatrics* **25**:129–133.

11. Crols,R., Saerens,J., Noppe,M., and Lowenthal,A. 1986. Increased GFAP levels in CSF as a marker of organicity in patients with Alzheimer's disease and other types of irreversible chronic organic brain syndrome. *J. Neurol.* **233**:157–160.
12. Kristjánisdóttir,R., Uvebrant,P., and Rosengren,L. 2001. Glial fibrillary acidic protein and neurofilament in children with cerebral white matter abnormalities. *Neuropediatrics* **32**:307–312.
13. Blennow,M., Sävman,K., Ilves,P., Thoresen,M., and Rosengren,L. 2001. Brain-specific proteins in the cerebrospinal fluid of severely asphyxiated newborn infants. *Acta Paediatrica* **90**:1171–1175.
14. Blennow,M., et al. 1996. Glial fibrillary acidic protein is increased in the cerebrospinal fluid of preterm infants with abnormal neurological findings. *Acta Paediatr.* **85**:485–489.
15. Kyllerman,M., Rosengren,L., Wiklund,L.M., and Holmberg,E. 2005. Increased levels of GFAP in the cerebrospinal fluid in three subtypes of genetically confirmed Alexander disease. *Neuropediatrics* **36**:319–323.
16. Rosengren,L.E., Lycke,J., and Andersen,O. 1995. Glial fibrillary acidic protein in CSF of multiple sclerosis patients: Relation to neurological deficit. *J. Neurol. Sci.* **133**:61–65.
17. Norgren,N., e al. 2004. Neurofilament and glial fibrillary acidic protein in multiple sclerosis. *Neurology* **63**:1586–1590.
18. Dotevall,L., Hagberg,T., Karlsson,J.E., and Rosengren,L.E. 1999. Astroglial and neuronal proteins in cerebrospinal fluid as markers of CNS involvement in Lyme neuroborreliosis. *European Journal of Neurology* **6**:169–178.
19. Trysberg,E., Nylen,K., Rosengren,L.E., and Tarkowski,A. 2003. Neuronal and astrocytic damage in systemic lupus erythematosus patients with central nervous system involvement. *Arthritis & Rheumatism* **48**:2881–2887.
20. Notturmo,F., Caporale,C.M., De Laurentis,A., and Uncini,A. 2008. Glial fibrillary acidic protein: A marker of axonal Guillain-Barre syndrome and outcome. *Muscle Nerve* **38**:899–903.
21. Wallin,A., Blennow,K., and Rosengren,L.E. 1996. Glial fibrillary acidic protein in the cerebrospinal fluid of patients with dementia. *Dementia* **7**:267–272.

22. Fukuyama,R., Izumoto,T., and Fushiki,S. 2001. The cerebrospinal fluid level of glial fibrillary acidic protein is increased in cerebrospinal fluid from Alzheimer's disease patients and correlates with severity of dementia. *Eur. Neurol.* **46**:35–38.
23. Albrechtsen,M., Sørensen,P.S., Gjerris,F., and Bock,E. 1985. High cerebrospinal fluid concentration of glial fibrillary acidic protein (GFAP) in patients with normal pressure hydrocephalus. *J. Neurol. Sci.* **70**:269–274.
24. Tullberg,M., Rosengren,L., Blomsterwall,E., Karlsson,J.E., and Wikkelsø,C. 1998. CSF Neurofilament and glial fibrillary acidic protein in normal pressure hydrocephalus. *Neurology* **50**:1122–1127.
25. Gurnett,C.A., Landt,M., and Wong,M. 2003. Analysis of cerebrospinal fluid glial fibrillary acidic protein after seizures in children. *Epilepsia* **44**:1455–1458.
26. Steiner,J., et al. 2006. Increased cerebrospinal fluid and serum levels of S100B in first-onset schizophrenia are not related to a degenerative release of glial fibrillar acidic protein, myelin basic protein and neurone-specific enolase from glia or neurones. *J. Neurol. Neurosurg. Psychiatry* **77**:1284–1287.

**Supplemental Table 2: GFAP appears in the serum under certain circumstances**

| CONDITION                                 | CONTROLS |                            |             | PATIENTS |                                                                  |                 | REF |
|-------------------------------------------|----------|----------------------------|-------------|----------|------------------------------------------------------------------|-----------------|-----|
|                                           | n        | mean $\pm$ SD<br>ng/L      | range       | n        | mean $\pm$ SD ng/L                                               | range           |     |
| <i>Vascular</i>                           |          |                            |             |          |                                                                  |                 |     |
| ischemic stroke                           | 46       | 95% < 40                   | 14–66<br>0  | 22       | 2000 $\pm$ 1500 (SEM) <sup>a</sup>                               |                 | (1) |
| hemorrhagic stroke                        | 52<br>3  | <1.8<br>3.8–7.2            | nr          | 42       | 112 $\pm$ 477                                                    | 0–3096          | (2) |
| subarachnoid<br>hemorrhage                | 81       | < 150                      | nr          | 116      | 1130 mean; 330<br>median                                         | 30–34,43<br>0   | (3) |
| <i>Trauma</i>                             |          |                            |             |          |                                                                  |                 |     |
| traumatic brain injury                    | 70       | 97.5% < 33                 | 2–49        | 25       | 100 $\pm$ 180 at<br>admission                                    | nr              | (4) |
| traumatic brain injury                    | 72       | 95% < 49                   | 150–7<br>60 | 3        | nr                                                               | 5000–13,<br>000 | (5) |
| traumatic brain injury -<br>non-survivors |          | manufacturer<br>data       | 30–30<br>0  | 39       | ~6000 median                                                     |                 | (6) |
| traumatic brain injury                    | 218      | 61 $\pm$ 44; 95 %<br>< 150 | nr          | 59       | 4520 $\pm$ 8690; 1170<br>median                                  | 140–49,5<br>80  | (7) |
| <i>Developmental</i>                      |          |                            |             |          |                                                                  |                 |     |
| hydrocephalus (not<br>altered)            | 8        | 200 $\pm$ 200              | nr          | 27<br>12 | grade 1: 300 $\pm$ 300<br>(ns)<br>grade 2: 500 $\pm$ 300<br>(ns) | nr              | (8) |
| <i>Infectious and inflammatory</i>        |          |                            |             |          |                                                                  |                 |     |
| multiple sclerosis                        | 30       | 410 median                 | nr          | 30       | 2810 median                                                      | nr              | (9) |
| Guillain-Barré<br>syndrome                | 30       | 410 median                 | nr          | 17<br>20 | axonal : 740<br>median                                           | nr              | (9) |

|                             |          |                                    |           |    |                     |         |      |
|-----------------------------|----------|------------------------------------|-----------|----|---------------------|---------|------|
|                             |          |                                    |           |    | ADIP: 580<br>median |         |      |
| <i>Neoplastic</i>           |          |                                    |           |    |                     |         |      |
| glioma                      | nr       | < 150                              | nr        | 31 | high grade: 239     | 30–1210 | (10) |
| GBM                         | 50<br>54 | healthy: 0<br>non GBM: 0<br>median | 0<br>0–24 | 50 | GBM: 180 median     | 0–5600  | (11) |
| <i>Miscellaneous</i>        |          |                                    |           |    |                     |         |      |
| schizophrenia (not altered) | 17       | 180 ± 150                          | nr        | 12 | 160 ± 150 (ns)      | nr      | (12) |

All values have been converted to ng/L to facilitate comparison. Unless otherwise noted, values are given as mean ± standard deviation (SD). ADIP, acute demyelinating inflammatory neuropathy; GBM, glioblastoma multiforme; n, number of patients or controls; ns, not significant; SEM, standard error of the mean.

<sup>a</sup> Data was presented in graphical form, from which these are estimated values.

#### Reference List

1. Vissers, J.L.M., et al. 2006. Rapid immunoassay for the determination of glial fibrillary acidic protein (GFAP) in serum. *Clin. Chim. Acta* **366**:336–340.
2. Foerch, C., et al. 2006. Serum glial fibrillary acidic protein as a biomarker for intracerebral haemorrhage in patients with acute stroke. *J. Neurol. Neurosurg. Psychiatry* **77**:181–184.
3. Nylén, K., et al. 2007. Serum glial fibrillary acidic protein is related to focal brain injury and outcome after aneurysmal subarachnoid hemorrhage. *Stroke* **38**:1489–1494.
4. Missler, U., Wiesmann, M., Wittmann, G., Magerkurth, O., and Hagenström, H. 1999. Measurement of glial fibrillary acidic protein in human blood: analytical method and preliminary clinical results. *Clin. Chem.* **45**:138–141.



5. van Geel,W.J.A., et al. 2002. Measurement of glial fibrillary acidic protein in blood: an analytical method. *Clin. Chim. Acta* **326**:151–154.
6. Pelinka,L.E., et al. 2004. Glial fibrillary acidic protein in serum after traumatic brain injury and multiple trauma. *J. Trauma* **57**:1006–1012.
7. Nylén,K., et al. 2006. Increased serum-GFAP in patients with severe traumatic brain injury is related to outcome. *J. Neurol. Sci.* **240**:85–91.
8. Beems,T., et al. 2003. Serum- and CSF-concentrations of brain specific proteins in hydrocephalus. *Acta Neurochirurgica* **145**:37–43.
9. Notturmo,F., Caporale,C.M., De Laurentis,A., and Uncini,A. 2008. Glial fibrillary acidic protein: A marker of axonal Guillain-Barre syndrome and outcome. *Muscle Nerve* **38**:899–903.
10. Brommeland,T., Rosengren,L., Fridlund,S., Hennig,R., and Isaksen,V. 2007. Serum levels of glial fibrillary acidic protein correlate to tumour volume of high-grade gliomas. *Acta Neurol. Scand.* **116**:380–384.
11. Jung,C.S., et al. 2007. Serum GFAP is a diagnostic marker for glioblastoma multiforme. *Brain* **130**:3336–3341.
12. Steiner,J., et al. 2006. Increased cerebrospinal fluid and serum levels of S100B in first-onset schizophrenia are not related to a degenerative release of glial fibrillar acidic protein, myelin basic protein and neurone-specific enolase from glia or neurones. *J. Neurol. Neurosurg. Psychiatry* **77**:1284–1287.
